# Supplementary material for: Ruthenium(ii) carbonyl complexes bearing CCC-pincer bis-(carbene) ligands: synthesis, structures and activities toward recycle transfer hydrogenation reactions
Source: Royal Society of Chemistry journal article supplement (doi:10.1039/c3dt51161h), 2013-01-01
Supplement: c3dt51161h.pdf [file c3dt51161h.pdf]

## Electronic supplementary information

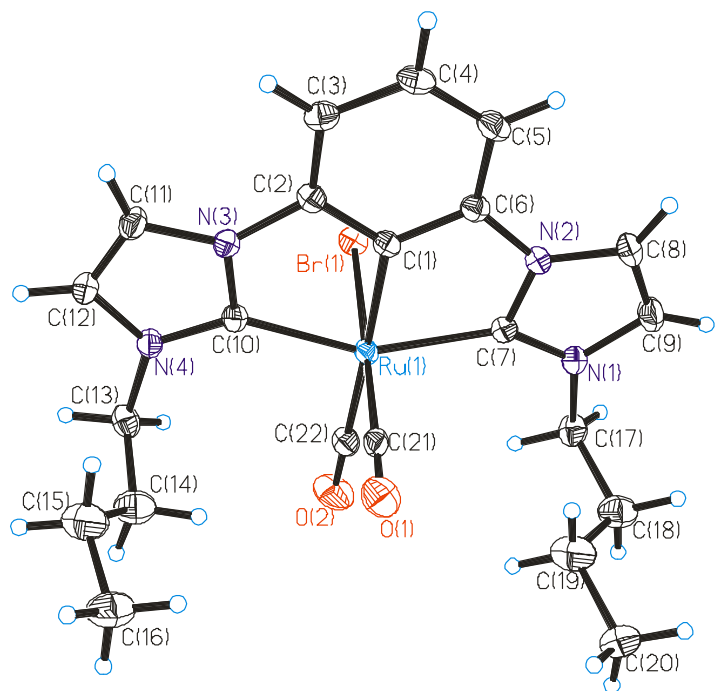

Figure S1. ORTEP plot (30 % probability ellipsoids) of **2b**. PF<sub>6</sub> anion is omitted for clarity.

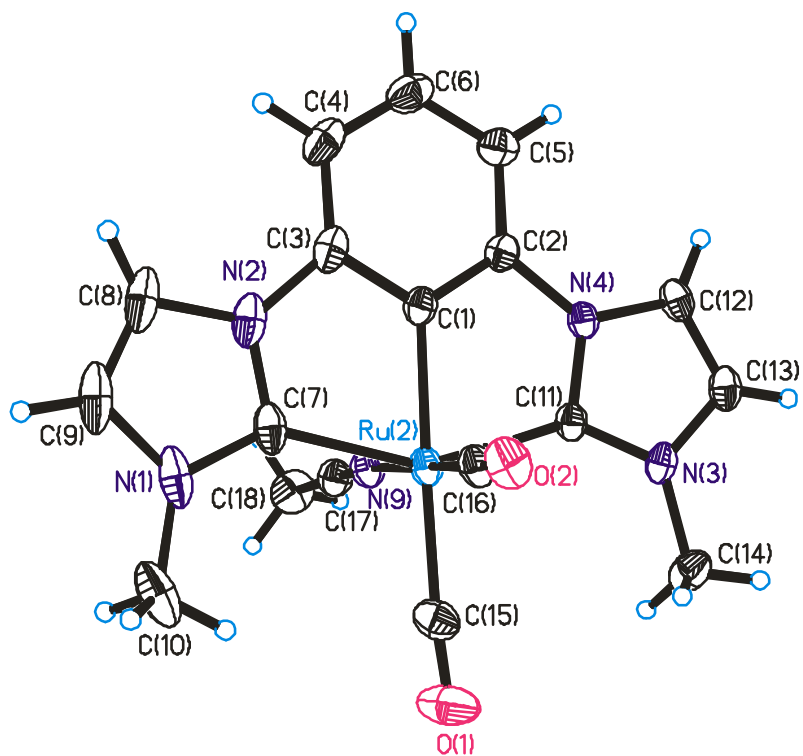

Figure S2. ORTEP plot (30 % probability ellipsoids) of **3a**. PF<sub>6</sub> anion is omitted for clarity.

Table S1. Crystal and data collection parameters for complexes **2a**, **2b**, **3a**, **3b**, **4a**, **5a**, **6a**, and **7a**

|                                                                   | <b>2a</b>                                                          | <b>2b</b>                                                          | <b>3a</b>                                                                        | <b>3b · CH<sub>3</sub>CN</b>                                                     | <b>4a · CH<sub>3</sub>CN · 0.5acetone</b>                                                                     | <b>5a</b>                                                          | <b>6a</b>                                                                        | <b>7a</b>                                                          |
|-------------------------------------------------------------------|--------------------------------------------------------------------|--------------------------------------------------------------------|----------------------------------------------------------------------------------|----------------------------------------------------------------------------------|---------------------------------------------------------------------------------------------------------------|--------------------------------------------------------------------|----------------------------------------------------------------------------------|--------------------------------------------------------------------|
| Formula                                                           | C <sub>16</sub> H <sub>13</sub> IN <sub>4</sub> O <sub>2</sub> Ru  | C <sub>22</sub> H <sub>25</sub> BrN <sub>4</sub> O <sub>2</sub> Ru | C <sub>18</sub> H <sub>16</sub> F <sub>6</sub> N <sub>5</sub> O <sub>2</sub> PRu | C <sub>26</sub> H <sub>31</sub> F <sub>6</sub> N <sub>6</sub> O <sub>2</sub> PRu | C <sub>45</sub> H <sub>50</sub> F <sub>12</sub> N <sub>14</sub> O <sub>3</sub> P <sub>2</sub> Ru <sub>2</sub> | C <sub>25</sub> H <sub>21</sub> IN <sub>6</sub> ORu                | C <sub>22</sub> H <sub>21</sub> F <sub>6</sub> N <sub>6</sub> O <sub>2</sub> PRu | C <sub>21</sub> H <sub>21</sub> F <sub>6</sub> N <sub>6</sub> OPRu |
| Formula weight                                                    | 521.2                                                              | 558.44                                                             | 580.40                                                                           | 705.61                                                                           | 1327.07                                                                                                       | 649.45                                                             | 647.49                                                                           | 619.48                                                             |
| Crystal size (mm <sup>3</sup> )                                   | 0.38x0.26x0.25                                                     | 0.33x0.33x0.11                                                     | 0.19x0.18x0.15                                                                   | 0.52x0.28x0.23                                                                   | 0.30x0.27x0.19                                                                                                | 0.12x0.03x0.02                                                     | 0.22x0.22x0.15                                                                   | 0.35x0.32x0.22                                                     |
| T (K)                                                             | 296(2)                                                             | 296(2)                                                             | 296(2)                                                                           | 296(2)                                                                           | 296(2)                                                                                                        | 296(2)                                                             | 296(2)                                                                           | 296(2)                                                             |
| Crystal system                                                    | Monoclinic                                                         | Orthorhombic                                                       | Triclinic                                                                        | Triclinic                                                                        | Monoclinic                                                                                                    | Monoclinic                                                         | Monoclinic                                                                       | Monoclinic                                                         |
| Space group                                                       | P2(1)/n                                                            | Pbca                                                               | P $\bar{1}$                                                                      | P $\bar{1}$                                                                      | P2(1)                                                                                                         | P2(1)/n                                                            | P2(1)/c                                                                          | P2(1)/c                                                            |
| <i>a</i> (Å)                                                      | 10.5225(6)                                                         | 13.5343(7)                                                         | 8.2596(2)                                                                        | 8.6684(4)                                                                        | 8.2987(12)                                                                                                    | 8.4655(5)                                                          | 12.3335(3)                                                                       | 10.9243(7)                                                         |
| <i>b</i> (Å)                                                      | 13.9073(8)                                                         | 16.3150(8)                                                         | 11.7151(3)                                                                       | 11.7651(5)                                                                       | 38.281(5)                                                                                                     | 15.8272(9)                                                         | 8.1254(2)                                                                        | 14.5417(10)                                                        |
| <i>c</i> (Å)                                                      | 12.1595(7)                                                         | 20.3240(10)                                                        | 11.9249(3)                                                                       | 15.6709(6)                                                                       | 8.8978(13)                                                                                                    | 18.9515(11)                                                        | 25.8414(7)                                                                       | 15.1796(10)                                                        |
| $\alpha$ (°)                                                      | 90                                                                 | 90                                                                 | 79.4890(10)                                                                      | 84.505(2)                                                                        | 90                                                                                                            | 90                                                                 | 90                                                                               | 90                                                                 |
| $\beta$ (°)                                                       | 92.3560(10)                                                        | 90                                                                 | 70.5020(10)                                                                      | 89.649(2)                                                                        | 92.463(4)                                                                                                     | 100.909(2)                                                         | 102.3980(10)                                                                     | 94.9790(10)                                                        |
| $\gamma$ (°)                                                      | 90                                                                 | 90                                                                 | 88.6630(10)                                                                      | 81.020(2)                                                                        | 90                                                                                                            | 90                                                                 | 90                                                                               | 90                                                                 |
| <i>V</i> (Å <sup>3</sup> )                                        | 1783.23(18)                                                        | 4487.8(4)                                                          | 1068.58(5)                                                                       | 1571.28(12)                                                                      | 2824.1(7)                                                                                                     | 2493.3(3)                                                          | 2529.29(11)                                                                      | 2402.3(3)                                                          |
| <i>Z</i>                                                          | 4                                                                  | 8                                                                  | 2                                                                                | 2                                                                                | 2                                                                                                             | 4                                                                  | 4                                                                                | 4                                                                  |
| <i>D</i> <sub>calc</sub> (g cm <sup>-3</sup> )                    | 1.942                                                              | 1.653                                                              | 1.804                                                                            | 1.491                                                                            | 1.561                                                                                                         | 1.738                                                              | 1.706                                                                            | 1.721                                                              |
| $\mu$ (mm <sup>-1</sup> )                                         | 2.626                                                              | 2.505                                                              | 0.887                                                                            | 0.619                                                                            | 0.683                                                                                                         | 1.897                                                              | 0.761                                                                            | 0.793                                                              |
| $\theta$ Range/°                                                  | 2.22 – 26.42                                                       | 2.00 – 30.33                                                       | 1.77 – 30.72                                                                     | 1.76 – 30.81                                                                     | 2.13 – 25.00                                                                                                  | 1.69 – 26.43                                                       | 1.61 – 25.00                                                                     | 1.87 – 30.65                                                       |
| Reflections collected /<br>unique                                 | 20585 / 3665<br>[R(int) = 0.035]                                   | 38935 / 6662<br>[R(int) = 0.0450]                                  | 22259 / 6567<br>[R(int) = 0.0305]                                                | 33472 / 9774<br>[R(int) = 0.0373]                                                | 16592 / 8325<br>[R(int) = 0.0295]                                                                             | 24610 / 5115<br>[R(int) = 0.0470]                                  | 28945 / 4470<br>[R(int) = 0.0303]                                                | 42382 / 7410<br>[R(int) = 0.0301]                                  |
| data/ restraints/ parameters                                      | 3665 / 1 / 219                                                     | 6662 / 0 / 261                                                     | 6567 / 0 / 318                                                                   | 9774 / 36 / 408                                                                  | 8325 / 1 / 740                                                                                                | 5115 / 0 / 249                                                     | 4470 / 0 / 388                                                                   | 7410 / 0 / 345                                                     |
| Goodness-of-fit on <i>F</i> <sup>2</sup>                          | 1.067                                                              | 1.055                                                              | 1.028                                                                            | 1.026                                                                            | 1.067                                                                                                         | 1.028                                                              | 1.046                                                                            | 1.048                                                              |
| Final <i>R</i> indices [ <i>I</i> > 2 $\sigma$ ( <i>I</i> )]      | <i>R</i> <sub>I</sub> = 0.0362,<br><i>wR</i> <sub>2</sub> = 0.1008 | <i>R</i> <sub>I</sub> = 0.0416,<br><i>wR</i> <sub>2</sub> = 0.1071 | <i>R</i> <sub>I</sub> = 0.0339,<br><i>wR</i> <sub>2</sub> = 0.0885               | <i>R</i> <sub>I</sub> = 0.0405,<br><i>wR</i> <sub>2</sub> = 0.1063               | <i>R</i> <sub>I</sub> = 0.0409,<br><i>wR</i> <sub>2</sub> = 0.0912                                            | <i>R</i> <sub>I</sub> = 0.0495,<br><i>wR</i> <sub>2</sub> = 0.1206 | <i>R</i> <sub>I</sub> = 0.0264,<br><i>wR</i> <sub>2</sub> = 0.0667               | <i>R</i> <sub>I</sub> = 0.0322,<br><i>wR</i> <sub>2</sub> = 0.0886 |
| <i>R</i> <sub>I</sub> / <i>wR</i> <sub>2</sub> indices (all data) | 0.0474 / 0.1087                                                    | 0.0607 / 0.1171                                                    | 0.0408 / 0.0945                                                                  | 0.0580 / 0.1161                                                                  | 0.0443 / 0.0931                                                                                               | 0.0710 / 0.1343                                                    | 0.0331 / 0.0712                                                                  | 0.0408 / 0.0978                                                    |
| Largest diff. peak and<br>hole(e·Å <sup>-3</sup> )                | 1.077 and -0.952                                                   | 2.370 and -1.356                                                   | 0.758 and -0.514                                                                 | 0.729 and -0.487                                                                 | 0.538 and -1.079                                                                                              | 1.448 and -1.335                                                   | 0.418 and -0.308                                                                 | 0.637 and -0.463                                                   |
